## 43 1 Introduction

44 The Twin Arginine Transport system (Tat) is one of two protein transport  
45 pathways that deliver proteins to the lumen of the plant thylakoid; a homologous Tat  
46 pathway is also found in a wide range of bacteria (Celedon and Cline, 2013; Berks,  
47 2015; Cline, 2015). The Tat system is distinguished from other protein transport  
48 pathways, such as the well-characterized Secretory (Sec) system, by transporting fully-  
49 folded precursor proteins using only the proton-motive force (PMF) for energy (Cline  
50 and Mori, 2001; Braun et al., 2007; Gérard and Cline, 2007). Proteins transported by the  
51 Tat pathway are usually cytosolically synthesized as higher molecular weight precursors  
52 containing cleavable N-terminal signal peptides with an obligate twin arginine motif (RR)  
53 as is reflected in the name of the system. Tat systems can transport precursor proteins  
54 of different sizes ranging from 2 kDa to over 100 kDa, as well as substrates that form  
55 oligomers (Ma and Cline, 2010; Celedon and Cline, 2012). A recent stoichiometry study  
56 suggested that each individual Tat translocase can bind up to eight precursor proteins  
57 when fully saturated and is transport active when sufficient Tha4 is present (Celedon  
58 and Cline, 2012). However, mechanistic detail of how the receptor complex organizes to  
59 accommodate the transport of multiple precursor proteins in concert is an important  
60 question that needs to be addressed.

61 In thylakoid (as well as in *E. coli*) three membrane-bound protein components,  
62 Tha4 (TatA), Hcf106 (TatB), and cpTatC (TatC), are responsible for the twin arginine  
63 dependent translocation of precursor cargo (Cline and Mori, 2001; Celedon and Cline,  
64 2013). Current models of the Tat system suggest a cyclical mechanism in which the  
65 receptor complex is comprised of cpTatC and Hcf106 tightly bound to each other with a  
66 loosely associated Tha4 that serves as the initial site of precursor recognition and  
67 binding, followed by assembly of additional Tha4 homo-oligomers, which are proposed  
68 to form the translocation pore (Bolhuis et al., 2001; Cline and Mori, 2001; Dabney-Smith  
69 et al., 2006; Dabney-Smith and Cline, 2009; Aldridge et al., 2012; Pal et al., 2013).  
70 Hcf106 is structurally similar to Tha4 in that both contain an amino terminal  
71 transmembrane domain (TMD), followed by a hinge region, an amphipathic  $\alpha$ -helix  
72 (APH), and a loosely structured carboxyl terminus (C-tail). Recently, the structures of  
73 Tha4 and Hcf106 bacterial homologs, TatA and TatB, have been solved which agree  
74 with previous predictions (Hu et al., 2010; Zhang et al., 2014) and even more recently  
75 the structure to Tha4 from *Arabidopsis thaliana* (Pettersson et al., 2018). Despite the  
76 sequence similarity with Tha4, the two proteins are not interchangeable and thus  
77 appear to have distinct functions (Dabney-Smith et al., 2003).

78 Although the cpTat receptor complex has been well studied for its essential role  
79 in recognizing precursor proteins, few studies in plants have addressed the role of  
80 Hcf106 in this process, particularly, how each individual Hcf106 is organized in the  
81 multimeric receptor complex as compared to the bacterial homolog TatB (Bolhuis et al.,  
82 2001; Alami et al., 2003; Lee et al., 2006; Holzapfel et al., 2007; Rollauer et al., 2012;  
83 Behrendt and Bruser, 2014). The aim of the present work was to establish a method  
84 allowing the exploration Hcf106 organization using systematic cysteine substitution. As  
85 proof of principle, we have used this method to map Hcf106-Hcf106 interactions in  
86 thylakoid membranes.

87 Previous studies showed that *in vitro* translated Hcf106 can integrate into  
88 thylakoid in a manner presumably similar to endogenous Hcf106 and exists in a

89 receptor complex with cpTatC (Gérard and Cline, 2006), which was capable of binding  
90 precursor proteins (Mori and Cline, 2002; Gérard and Cline, 2006). What remains  
91 unclear from the results of these studies is whether the integrated Hcf106 were simply  
92 members of the complex or directly participated in binding either precursor and/or  
93 cpTatC. Here, we have used cysteine scanning and disulfide bond formation to  
94 systematically map Hcf106 interactions through the TMD to the APH regions, which are  
95 known to be of great importance to the organization of the receptor complex. We  
96 observed that single cysteine-substituted Hcf106 protomers integrate into isolated  
97 thylakoid, that most variants are resistant to alkaline extraction. And that they localize in  
98 a 700 kDa complex by blue-native PAGE, suggesting that they are fully integrated into  
99 the membrane. Interaction sites of Hcf106-Hcf106 were obtained using copper (II)-1,  
100 10-phenanthroline (CuP)-induced cross-linking which provided vital clues for the  
101 organization of Hcf106. Using double cysteine substitution in Hcf106, we could detect  
102 an Hcf106 oligomer as large as an octamer but could not distinguish if these oligomers  
103 were in the receptor complex or part of a separate pool of Hcf106. However, integrated  
104 Hcf106 was capable of interacting with transport competent precursor in a specific  
105 manner and with exogenous, imported cpTatC. From these data we conclude that  
106 integrated Hcf106 is capable of associating with and participating in the function of the  
107 cpTat translocase.

108

## 109 **2 Materials and Methods**

### 110 **2.1 Preparation of chloroplasts and thylakoid membranes**

111 Intact chloroplasts were prepared from 10-12 day-old pea seedlings (*Pisum*  
112 *sativum* L. cv. Laxton's Progress 9 or Little Marvel) as described (Cline et al., 1993).  
113 Intact, isolated chloroplasts were suspended to 1 mg/ml chlorophyll in import buffer (IB,  
114 50 mM HEPES-KOH, pH 8.0, 330 mM sorbitol) and kept on ice until used. Isolated  
115 thylakoid were obtained by osmotic lysis of intact chloroplasts. Briefly, intact chloroplast  
116 suspensions were pelleted for 5 min at 1000 xg, supernatant removed, and suspended  
117 at 1 mg/ml chlorophyll in lysis buffer (50 mM HEPES-KOH, pH 8.0, 10 mM MgCl<sub>2</sub>) with  
118 incubation on ice for 5 min. Following lysis, an equal volume of IB, 10 mM MgCl<sub>2</sub> was  
119 added to the lysate, the thylakoid were then pelleted at 3200 xg for 8 min, and  
120 suspended at 1 mg/ml chlorophyll in IB, 10 mM MgCl<sub>2</sub> (Aldridge et al., 2012). For single  
121 Cys interaction studies, thylakoid were suspended in 50 mM *N*-ethylmaleimide (NEM) in  
122 IB, 10 mM MgCl<sub>2</sub> and incubated on ice for 10 min to prevent non-specific crosslinking  
123 from endogenous free sulfhydryl groups. NEM-treated thylakoid were subsequently  
124 pelleted and washed with 3 volumes of IB, 10 mM MgCl<sub>2</sub> before use.

125

### 126 **2.2 Generation of Cysteine-substituted mature Hcf106 and C-tail truncation**

#### 127 **Hcf106<sub>1-107</sub>**

128 Hcf106 with cysteine substitutions (Hcf106X<sub>n</sub>C; where amino acid X at position *n*  
129 was replaced by cysteine) were generated by QuikChange mutagenesis (Agilent  
130 Technologies) according to manufacturer's instructions. The template used for  
131 mutagenesis was the coding sequence for mature Hcf106 (lacking the targeting peptide)  
132 in the plasmid pGEM-4Z. The coding sequence for Hcf106 begins with  
133 MASLFGVGAPEA... Cloned constructs were verified by DNA sequencing on both  
134 strands at the Center for Bioinformatics and Functional Genomics at Miami University.

135 For the C-tail truncation of Hcf106<sub>1-107</sub>, internal stop codons were inserted via primer-  
136 based mutagenesis to generate the C-deletion of 69 amino acids. The size of the  
137 truncated Hcf106 is about 17kD by SDS-PAGE analysis.

138

### 139 **2.3 Preparation of radiolabeled recombinant Hcf106 proteins**

140 Radiolabeled Hcf106 variants were prepared by *in vitro* translation in a wheat  
141 germ extract from capped mRNA in the presence of [<sup>3</sup>H]leucine (Cline, 1986). The  
142 translation products were diluted with an equal volume of 60 mM leucine in 2× import  
143 buffer before use. Hcf106<sub>1-107</sub> translation product was diluted further with 1× import  
144 buffer, 30 mM leucine equal to 1:3, 1:6, 1:12, or 1:60 of the initial translation before use.

145

### 146 **2.4 *In vitro* integration assay**

147 *In vitro* translated [<sup>3</sup>H]Hcf106X<sub>n</sub>C was integrated into NEM-pretreated thylakoid  
148 (100 µg chlorophyll equivalent) for 25 min at 25 °C. For Hcf106<sub>1-107</sub>, *in vitro* translated  
149 protein was directly integrated into isolated thylakoid. Reactions were terminated by  
150 transfer to 0°C and thylakoid were recovered by centrifugation at 3200 xg for 8 min.  
151 Recovered thylakoid were washed once with 2 volumes of IB, 10 mM MgCl<sub>2</sub>.

152

### 153 **2.5 Alkaline extraction assay**

154 Thylakoid with Hcf106 integrated were suspended to 1 mL with 0.2 M Na<sub>2</sub>CO<sub>3</sub> or  
155 0.1 M NaOH and incubated for 60 min on ice. Thylakoid were then recovered by  
156 centrifugation at 100,000 xg for 15 min. Pellets were suspended in 30 µl of 20 mM  
157 EDTA 1× IB and mixed with the same volume of 2× reducing sample solubilizing buffer  
158 (2× SSB (red); 100 mM Tris-HCl (pH 6.8), 0.2 M DTT, 5% SDS, and 30% glycerol).  
159 Samples were analyzed by SDS-PAGE and fluorography.

160

### 161 **2.6 Blue-native gel electrophoresis**

162 Hcf106 integrated thylakoid (~1 mg/ml chlorophyll) were dissolved in 2% digitonin  
163 with end-over-end mixing for 1 h at 4 °C and centrifuged at 100,000 xg for 30 min.  
164 Supernatant was mixed with 0.1 vol 10× BN-PAGE sample buffer (5% Serva G, 30%  
165 sucrose in 100 mM BisTris-HCl, 500 mM 6-amino-caproic acid, pH 7.0) as described by  
166 Cline and Mori (Cline and Mori, 2001). Gels were analyzed by fluorography or  
167 subjected to immunoblotting as described (Cline and Mori, 2001). Molecular markers  
168 used for blue native gels were dimeric and monomeric ferritin (880 kDa and 440 kDa,  
169 respectively) and bovine serum albumin (BSA) dimer (132 kDa).

170

### 171 **2.7 Oxidative cross-linking by disulfide bond formation**

172 Hcf106 integrated thylakoid were used for cross-linking reactions. 1 mM copper  
173 (II)-1, 10-phenanthroline (CuP from a 150 mM stock) was added as an oxidant to  
174 catalyze disulfide formation between proximal cysteine residues. The CuP stock  
175 solution (150 mM) contained 150 mM CuSO<sub>4</sub> and 500 mM 1, 10-phenanthroline  
176 (Dabney-Smith et al., 2006). Cross-linking reactions were carried out for 5 min before  
177 stopping with 50 mM ethylmaleimide (NEM, from a 1 M stock in ethanol) and diluted two  
178 fold with 1× IB, 10 mM MgCl<sub>2</sub>. Thylakoids were recovered by centrifugation at 3200 xg  
179 for 8 min, the supernatants removed, and the pellet was suspended in 1× IB, 5 mM  
180 EDTA, 10 mM NEM and subjected to centrifugation and supernatant removal. Thylakoid

181 pellets were suspended to ~1 mg/ml chlorophyll and divided into two, centrifuged at  
182 3200 xg for 8 min, and the supernatants removed. The first half was suspended in 2×  
183 non-reducing sample solubilizing buffer (2× SSB (nr); 100 mM Tris-HCl (pH 6.8), 8 M  
184 urea, 5% SDS, and 30% glycerol) and the second half was suspended in 2× SSB (red).  
185 Samples then were analyzed by SDS-PAGE and fluorography. The intensities of the  
186 bands were quantified with ImageJ software (Schneider et al., 2012).

187

## 188 **2.8 Disulfide cross-linking of imported cpTatC and integrated Hcf106**

189 The precursor to cpTatC, pre-cpTatCaaaV270C (Kenneth Cline, University of  
190 Florida), was used as a source of exogenously integrated cpTatC according to  
191 published methods (Aldridge et al., 2014). Three native cysteines were substituted with  
192 alanine, hence the 'aaa' designation, and a single cysteine substitution was added at  
193 position V270. Radiolabeled *in vitro* translated pre-cpTatCaaaV270C was incubated  
194 with chloroplasts (0.33 mg/ml chlorophyll) and 5 mM Mg-ATP in IB with 100  $\mu\text{E}/\text{m}^2/\text{s}$  of  
195 white light in a 25°C water bath for 40 min. After import, intact chloroplasts were treated  
196 with thermolysin for 40 min at 4°C and isolated by centrifugation through a 35% Percoll  
197 (GE Healthcare) cushion in IB, 5 mM EDTA and washed with IB (Cline et al., 1993).  
198 Thylakoid membranes were prepared from isolated chloroplasts by osmotic lysis and  
199 centrifugation as described above and suspended in IB, 5 mM  $\text{MgCl}_2$  to ~1 mg/ml  
200 chlorophyll. *In vitro* translated, unlabeled Hcf106 was integrated into thylakoid as  
201 described above. Thylakoids were centrifuged at 3200 xg, 8 min to remove  
202 unincorporated Hcf106 and washed with IB, 10mM  $\text{MgCl}_2$ . Samples were subjected to  
203 cross-linking as describe above.

204

## 205 **2.9 Disulfide cross-linking of integrated Hcf106 and precursor**

206 Radiolabeled, *in vitro* translated precursor tOE17-25C V-20F, containing an  
207 inserted cysteine 25 residues upstream from the signal peptide cleavage site, was  
208 incubated with thylakoids which had been pre-integrated with *in vitro* translated,  
209 unlabeled Hcf106 in IB, 10mM  $\text{MgCl}_2$  at 100  $\mu\text{E}/\text{m}^2/\text{s}$  of white light in a 25 °C water bath  
210 for 5 min. Samples were subjected to cross-linking as described above.

211

## 212 **2.10 Supplemental Information**

213 **Supplemental Figure S1.** Hcf106 with cysteine substitutions in the (A) N-terminus, (B)  
214 TMD, (C) hinge integrates into thylakoid and is resistant to alkaline extraction.

215 **Supplemental Figure S2.** Quantification of Hcf106 dimer formation in the TMD and  
216 APH.

217 **Supplemental Figure S3.** Most Hcf106 dimers disappear in the presence of the  
218 reducing agent, dithiothreitol (DTT).

219

## 220 **3 Results**

### 221 **3.1 Single cysteine variants of Hcf106 integrate into thylakoid membranes and are 222 resistant to alkaline extraction**

223 Earlier work demonstrated that *in vitro* translated wild type Hcf106, which lacks  
224 native cysteines, was able to spontaneously integrate into isolated thylakoid and was  
225 resistant to alkaline extraction by either 0.2 M carbonate buffer (pH 9.5) or 0.1 M NaOH  
226 (pH 11.5) (Fincher et al., 2003). The NaOH treatment extracts proteins that are



227 peripherally associated with membrane or are partially embedded into the membrane  
228 via a single transmembrane domain; whereas carbonate extraction is capable of  
229 stripping peripherally associated proteins and but not embedded proteins (Rolland et al.,  
230 2006).

231 We generated a series of single-cysteine substitutions from the predicted  
232 transmembrane domain to the end of the predicted amphipathic helix in Hcf106 (Figure  
233 1) and investigated whether these cysteine substitutions, especially in the TMH,  
234 affected the integration of Hcf106 into the thylakoid membrane as compared to wild  
235 type.

236 Wild type Hcf106 is largely resistant to alkaline extraction (Fincher et al., 2003).  
237 Likewise, each of the Cys-substituted variants of Hcf106 tested were able to integrate  
238 into isolated thylakoid and were resistant to 0.2 M carbonate treatment. In addition,  
239 most of the variants were also resistant to 0.1 M NaOH extraction (Supplemental Figure  
240 S1); the exceptions are I15C, V17C, V18C, and L21C residues which are predicted to  
241 be in the hydrophobic core of the membrane. Thus, we concluded that the resistance of  
242 most single cysteine substituted Hcf106 to alkaline extraction indicates that the  
243 integration of recombinant Hcf106 into isolated thylakoids was not negatively affected.  
244

### 245 **3.2 Hcf106 Cys-variants can be detected in the 700 kDa receptor complex**

246 Blue-native polyacrylamide gel electrophoresis (BN-PAGE) has shown that the  
247 cpTatC/Hcf106 receptor complex migrates as a band at ~700 kDa after solubilization by  
248 the detergent digitonin (Cline and Mori, 2001; Fincher et al., 2003). In addition, previous  
249 studies showed that recombinant, wild type, thylakoid integrated Hcf106 also migrated  
250 at 700 kDa, as well as a separate pool of smaller complexes of ~400 kDa to ~200 kDa  
251 depending upon the detergent to membrane ratio (Mori et al., 2001; Fincher et al.,  
252 2003). Most of the single cysteine variants of Hcf106 were integrated into isolated  
253 thylakoid; therefore, we examined whether the integrated Cys variants would form  
254 oligomers when solubilized in detergent as shown by BN-PAGE (Figure 2). We  
255 reasoned that if the Cys variants of Hcf106 could interact with cpTatC, then we would  
256 expect to find the Cys variants incorporated into a ~700 kDa complex when digitonin-  
257 solubilized thylakoid were analyzed by BN-PAGE.

258 We integrated the Hcf106 variants into isolated thylakoid and solubilized the  
259 membranes with digitonin followed with analysis by BN-PAGE. The ratio of detergent to  
260 thylakoid chlorophyll content was critical because previous studies demonstrated that  
261 an increase in the ratio of detergent to thylakoid resulted in the persistence of the 700  
262 kDa receptor complex of cpTatC/Hcf106 complex, while the Hcf106 homo-oligomeric  
263 complexes between 400 kDa and 200 kDa were disrupted (Cline and Mori, 2001;  
264 Fincher et al., 2003). We were most interested in the presence or incorporation of  
265 Hcf106 in the 700 kDa receptor complex, so membrane solubilization was done at a  
266 ratio of 2% digitonin to 1 mg/ml chlorophyll to minimize the formation of the smaller  
267 homo-oligomeric complexes (Fincher et al., 2003). Bands seen at the bottom of the gel  
268 indicate the presence of smaller oligomers of Hcf106 (e.g., dimer to tetramer of ~60-120  
269 kDa), but nothing in the 200-400 kDa range. Of the cysteines placed close to the N-  
270 terminus, such as G6C, V7C, G8C, A9C, P10C, and E11C, only G8C (Figure 2, lane 3)  
271 and E11C (Figure 2, lane 6) were unable to migrate in a 700 kDa complex but did  
272 integrate successfully into thylakoid (Supplementary Figure S1), suggesting that key

273 contacts between Hcf106 and cpTatC were disrupted in those variants. Hcf106 variants  
274 with a Cys substitution in the transmembrane region such as A12C, L13C, V14C, I15C,  
275 G16C, V17C, V18C, A19C, L20C, L21C, and V22C (Figure 2, lanes 9-19), did migrate  
276 as a 700 kDa complex just like wild type Hcf106 (Figure 2, lanes 7-8, 21, 26, 39, 45)  
277 suggesting incorporation into the receptor complex. Most of the variants in the hinge  
278 region, i.e., F23C, G24C, K26C, or G27C (Figure 2, lanes 20, 22, 24, and 25) failed to  
279 incorporate into the receptor complex but were able to integrate into thylakoid  
280 (Supplemental Figure S1). P25C was able to incorporate into the receptor complex  
281 (Figure 2, lane 23). Cys variants in the APH region of Hcf106 showed a similar pattern  
282 to wild type when analyzed by BN-PAGE in that all single cysteine substitutions in this  
283 region did not abolish incorporation into the 700 kDa complex (Figure 2, lanes 26-57).  
284 However, certain cysteine substitutions, for example, E30C, A32C, K37C, E41C, Q43C,  
285 and P44C (Figure 2, lanes 29, 31, 36, 41, 43, and 44), consistently showed a lower  
286 intensity at the 700 kDa band, suggesting that cysteines in this region of the APH may  
287 negatively affect Hcf106 interaction with cpTatC (i.e., incorporation into the 700 kDa  
288 complex), but did not affect the integration and membrane stability of the variant  
289 (Supplemental Figure S1).

290

### 291 **3.3 C-terminal of Hcf106 is dispensable for cpTatC-Hcf106 receptor complex** 292 **formation**

293 Hcf106 contains a loosely-structured C-tail that was shown to not be required for  
294 receptor complex formation in the *E. coli* homolog, TatB (Maldonado et al., 2011). If the  
295 truncated Hcf106 could interact with cpTatC, we reasoned that truncated protein could  
296 be used to demonstrate that the integrated Hcf106 is, in fact, incorporating into receptor  
297 complexes with endogenous cpTatC (Figure 3). We incubated increasing amounts of  
298 [<sup>3</sup>H]Hcf106<sub>1-107</sub>, lacking 69 amino acids from the C terminus, with isolated thylakoid and  
299 analyzed the membranes by BN-PAGE. As the concentration of *in vitro* translated  
300 [<sup>3</sup>H]Hcf106<sub>1-107</sub> increased, two lower bands of ~600 kDa (Figure 3, lanes 2-4) and 500  
301 kDa (Figure 3, lanes 3-4) appeared, suggesting that *in vitro* integrated [<sup>3</sup>H]Hcf106 was  
302 competing with the endogenous Hcf106 for binding to endogenous cpTatC. The smaller  
303 complexes also contain cpTatC (Figure 3, lanes 9-12), indicating the C-tail does not  
304 play a critical role in receptor complex formation. Immunodetection of Hcf106 using the  
305 same thylakoid samples demonstrated that full length Hcf106 also migrated into smaller  
306 complexes due to the presence of the truncated variant. With these data, the  
307 insensitivity to alkaline extraction, and the incorporation into a 700 kDa complex, we  
308 conclude that exogenously added Hcf106 is properly inserted into the thylakoid  
309 membrane, allowing us to use these Cys-substituted variants to probe the organization  
310 of Hcf106 in the receptor complex.

311

### 312 **3.4 The transmembrane domain and amphipathic helix regions of Hcf106 form** 313 **self-contacts**

314 To characterize the organization of Hcf106-containing complexes, we looked at  
315 the organization of Hcf106 by studying interactions between neighboring Hcf106  
316 proteins. We reasoned that interactions between Hcf106 proteins would indicate the  
317 organization of Hcf106 in the receptor complex by identifying sites specific for self-  
318 interactions as well as provide insight into the organization of the separate pool of

319 Hcf106. We took a cysteine scanning approach, which allowed us to map interactions  
320 between neighboring single cysteine substituted Hcf106 proteins or other cpTat  
321 components by formation of disulfide bonds between cysteines within ~5 Å of each.  
322 Hcf106 proteins containing single cysteine substitutions in the TMD or APH were  
323 integrated into isolated thylakoid. In the presence of an oxidant such as copper (II)-1,10-  
324 phenanthroline (CuP), free cysteine sulfhydryls in close proximity will form stable  
325 disulfide bonds, which cause a mobility shift from ~28 kDa to ~56 kDa of the cross-  
326 linked proteins when analyzed by SDS-PAGE.

327 Residues close to the N-terminus of Hcf106 were in close proximity to the same  
328 residue of a neighboring Hcf106 (Figure 4, lanes 1-5) showing a significant amount of  
329 dimer formation, demonstrating that these amino acids are sufficiently close to form a  
330 disulfide bond or that this region is very flexible. On the other hand, when the Cys was  
331 placed in the TMD, i.e., E11C-L21C (Figure 4, lanes 6-16), dimer formation  
332 demonstrated a position-specific interaction, indicating a regular face of interaction in  
333 this portion of the transmembrane domain. As the cysteine substitution moved out of the  
334 TMD through the hinge and into the APH, i.e., V22C, F23C, and K26C (Figure 4, lanes  
335 17, 18, 21) formed a dimer, whereas G24C, P25C, and G27C (Figure 4, lanes 19, 20,  
336 22) did not.

337 The amphipathic helix of Hcf106 showed two different types of interaction. The  
338 N-terminal proximal portion of the APH, i.e., L28C-P44 (Figure 4, lanes 23-39), showed  
339 no interaction overall, with the exceptions of L28C, L35C, E41C, and F42C (Figure 4,  
340 lanes 23, 30, 36, 37), compared to the C-terminal proximal portion of the APH, T45C-  
341 G65C (Figure 4, lanes 40-60), which demonstrated a stronger and position-specific  
342 cross-linking. For example, dimer was detectable for all Cys-substitutions in this  
343 segment, but dimers formed with cysteines at I49C or Q50C were more intense (Figure  
344 4, compare lanes 44-45 with lanes 36-43) based on equal chlorophyll loading. The  
345 relative proportion of dimer to total protein was quantified by densitometric analysis  
346 (Supplemental Figure S3). The presence of a band at 56 kDa was dependent upon  
347 disulfide formation because treatment of samples with the reducing agent, dithiothreitol  
348 (DTT), effectively depleted the dimer species. Interestingly, L21C and V22C were not  
349 reduced to the monomeric form (Supplemental Figure S3).

350 The results of the specific interactions on the Hcf106 TMD or APH are plotted on  
351 helical wheels (Figure 5). For example, a helical wheel projection of the TMD with the  
352 hinge region (residues A12C-G27C) emphasizes that Hcf106 self-interactions occur  
353 along no particular face (Figure 5A). The APH domain (~40 amino acids) is too large to  
354 be clearly evaluated with one helical wheel, so we generated wheels for the N-terminal  
355 half (i.e., L28-P44; Figure 5B) and the C-terminal half (T45-G65; Figure 5C). The  
356 proline at position 44 was arbitrarily determined as the halfway point because it would  
357 serve to break the helix. The helical wheel of the N-terminal portion of the APH shows a  
358 preferred face for Hcf106 self-interaction because L28, L35 and F42 fall along the  
359 hydrophobic face of the helix (Figure 5B), although we do see interactions at E41C and  
360 P44C, which do not fall on the same face of the predicted helix. However, we envision  
361 the APH could be very mobile or dynamic in the membrane, which may explain the  
362 interactions at E41C and P44C. Other residues, e.g., A29C-T38C, showed no self-  
363 interactions indicating that these faces of the helix may be buried in the membrane,  
364 interacting with other cpTat components, or positioned such that they are not near each



365 other on neighboring helices. The helical wheel of the C-terminal portion of the APH  
366 demonstrated that roughly three of four faces can interact with neighboring Hcf106  
367 (Figure 5C), indicating that this portion of the helix might be flexible or that it could  
368 emanate from the membrane similarly to what was seen with Tha4 (Aldridge et al.,  
369 2012).

370

### 371 **3.5 Double-cysteine substitutions suggest a high-ordered Hcf106 complex**

372 Single cysteine substitutions can only detect dimers. To investigate the formation  
373 of higher-ordered oligomers, we constructed double cysteine substituted Hcf106 to  
374 detect an ability to form higher ordered protomers. We substituted two cysteines in the  
375 transmembrane helix of Hcf106, e.g., L13CL21C and V14CL20C, and the resulting  
376 proteins were integrated into thylakoid followed by oxidative crosslinking. Initially, when  
377 compared to the single cysteine variant L21C, the double Cys-substituted proteins  
378 L13CL21C and V14CL20C showed roughly half the integration into thylakoid as L21C  
379 (Figure 6A, compare lanes 7, 10 to 9, 12), while double cysteine variants in the APH,  
380 e.g., I49CE61C and R54CL60C (Figure 6A, compare lanes 8, 11 to lanes 9, 12), were  
381 comparable to the amount of L21C integrated. Decreased integration of the TMD  
382 double Cys variants was likely due to the introduction of two cysteines into the helix,  
383 decreasing the hydrophobicity of the TMD. Unexpectedly, the cross-linking of these four  
384 cysteine variants did not show obvious Hcf106 multimers (Figure 6A, lanes 1-2, 4-5).  
385 Furthermore, when the V14CL20C variant was compared to its single cysteine parent,  
386 V14C, the double Cys variant also showed about 30% less integration into thylakoids  
387 (Figure 6B, lanes 1-2). However, when one cysteine was placed in the N terminus and  
388 the other in the TMD, e.g., G6CV14C, we observed Hcf106 multimers as high as  
389 octamers when analyzed by 10-20% acrylamide gradient gel PAGE (Figure 6, lanes 3-  
390 4).

391 To further investigate if the cross-linked Hcf106 multimers are part of the 700  
392 kDa complex, we subjected the cross-linked G6CV14C double Cys variant to BN-PAGE  
393 (Figure 6C). Different cross-linking conditions were used including pre-treatment of the  
394 translation product with NEM to block the free cysteine (Figure 6, lane 1), the presence  
395 or absence of CuP (Figure 6, lanes 2 and 3), cross-linking without quenching (Figure 6,  
396 lane 4), and prolonged cross-linking (30 min) (Figure 6, lane 5). Samples were also  
397 subjected to non-reducing SDS-PAGE to monitor the status of cross-linking (Figure 6,  
398 lane 7-11). On BN-PAGE, we observed a significant amount of 700 kDa complex when  
399 the double cysteine variant was cross-linked (Figure 6, lane 2-5). Additional bands were  
400 also observed (above 800 kDa and <400 kDa, indicated with arrows), especially when  
401 cross-linking in the absence of NEM quenching (Figure 6, lane 4). The bands above the  
402 800 kDa could be non-specific interactions between the 700 kDa complex and other  
403 species. It could also be due to the different mobility of the complex caused by cross-  
404 linking induced conformational change. While we interpret the <400 kDa band to be  
405 indicative of the G6CV14C variant in the separate Hcf106 pool, which may also form  
406 higher oligomers. Overall, these results indicate Hcf106 has a strong tendency to form  
407 oligomers and that Hcf106 self-oligomerization might be present in both the receptor  
408 complex and the free pool of Hcf106.

409

### 410 **3.6 Integrated Hcf106 form contacts with both imported cpTatC and precursor** 411 **proteins**

412 To validate whether integrated Hcf106 can participate in the transport process  
413 directly, we looked for contacts between integrated Hcf106 and imported cpTatC or  
414 cpTat pathway precursor proteins. Previous studies found that endogenous Hcf106 can  
415 be photo-crosslinked with the signal peptide of precursor proteins when part of a  
416 functional receptor complex with cpTatC (Gérard and Cline, 2006), and that integrated,  
417 recombinant Hcf106 localizes to a complex that could bind precursor (Cline and Mori,  
418 2001).

419 Earlier work demonstrated that replacing the original cpTatC transit peptide with  
420 the transit peptide of the precursor to the small subunit of RuBisCO resulted in higher  
421 efficiency of pre-cpTatC import, mature cpTatC localization to thylakoid that could be  
422 detected in direct contact with both the RR proximal region on a Tat pathway precursor  
423 signal peptide and Tha4 (Aldridge et al., 2012; Ma and Cline, 2013; Aldridge et al.,  
424 2014). To confirm Cys-substituted Hcf106 participation in the receptor complex, we  
425 selected five Hcf106 Cys variants from the transmembrane domain and looked to see if  
426 they interact with imported cpTatCV270C. We initially chose transmembrane locations  
427 for cysteine substitution because recently the cpTatC bacterial homolog, TatC, was  
428 found to form crosslinks with the TatB (Hcf106) transmembrane domain via TatC TM5  
429 (Kneuper et al., 2012; Rollauer et al., 2012). Imported cpTatC270C was previously used  
430 to map Tha4 binding (Ma and Cline, 2013). We observed [<sup>3</sup>H]cpTatC at an apparent  
431 molecular weight of ~28 kDa, which matches the apparent molecular weight for  
432 endogenous cpTatC. Samples with integrated Hcf106, containing Cys-substitutions in  
433 the hydrophobic core of the Hcf106 transmembrane domain, e.g., A12C, L13C and  
434 V14C, formed interactions with cpTatCV270C, showing a ~56 kDa adduct that is not  
435 found in the control lane (Figure 7A). For the control lane, no Hcf106 was integrated into  
436 the thylakoid. In contrast, L20C, which is closer to the stromal side of the membrane,  
437 showed a similar result as the control lane. The data here demonstrate that integrated  
438 Hcf106 is in close contact with cpTatC.

439 Alternatively, to confirm that integrated, recombinant, Cys-substituted Hcf106  
440 was able to bind precursor, we integrated wild type Hcf106 or various Cys-substituted  
441 Hcf106 into thylakoid and used these membranes in precursor binding assays. The  
442 precursor, tOE17-25C/V-20F, was shown to bind tightly to the first cpTatC stromal loop  
443 (Gérard and Cline, 2007) and was used previously cpTatC crosslinking assays (Ma and  
444 Cline, 2010). It is a modified precursor of the 17 kDa subunit of the oxygen evolving  
445 complex, containing a truncated signal peptide (tOE17), a cysteine inserted on the N-  
446 terminal side of the twin arginine motif, 25 amino acids from the signal peptide cleavage  
447 site (-25C), and a phenylalanine substituted for the valine at position -20 from the signal  
448 peptide cleavage site (V-20F) [Figure 7, see reference (Ma and Cline, 2010)]. We  
449 subjected tOE17-25C/V-20F to cross-linking with the Hcf106 C-terminal APH region as  
450 it interacts with cpTatC stromal loop 1 (Figure 7C). This loop of cpTatC was also  
451 identified as interacting with tOE17-25C/V-20F. tOE17-25C/V-20F showed an  
452 interaction with Hcf106T38C, E48C, R54C, E63C, and I69C by the presence of a higher  
453 molecular weight adduct when analyzed by non-reducing SDS-PAGE. The strongest  
454 interactions involved Hcf106R54C, E63C, and I69C (Figure 7C, lanes 3-7), while wild  
455 type Hcf106, lacking cysteine, was not able to generate an adduct (Figure 7C, lane 2).

456 Taken together these data suggest that Hcf106 variants are incorporating into receptor  
457 complexes and can play a functional role in precursor binding.

458

#### 459 **4 Discussion**

460 Recently, structural insights of the individual prokaryotic Tat components were  
461 revealed which lay a solid foundation for deciphering the mechanism of the Tat system  
462 (Hu et al., 2010; Rollauer et al., 2012; Ramasamy et al., 2013; Zhang et al., 2014).  
463 Additionally Blümmel *et al.* used photo-crosslinking to elucidate the architecture of  
464 TatBC oligomers during the initial assembly step, but due to the nature of the technique  
465 could only provide specific residue location for one binding partner (Blümmel et al.,  
466 2015). Here, cysteine scanning by disulfide bond formation was used to provide a  
467 precise map of interactions between the two homologous proteins in thylakoid. Previous  
468 work using isolated thylakoids demonstrated a substrate-gated docking of Tha4 into the  
469 cpTatC cavity initiating translocase assembly (Aldridge et al., 2014) and challenging the  
470 receptor complex model from *E. coli* in which TatB forms a ring-like structure in the  
471 center with TatC occupying the peripheral positions (Maurer et al., 2010; Cline, 2015).  
472 However, how Hcf106-cpTatC are arranged to accommodate Tha4 docking and  
473 whether there are organizational differences between TatBC in *E. coli* and Hcf106-  
474 cpTatC in thylakoid have not been determined yet due to a lack of methodology to study  
475 the role of Hcf106 in isolate membranes.

476 Despite sharing significant sequence similarity, Tha4 and Hcf106 have distinct  
477 roles in protein transport (Cline and Mori, 2001; Dabney-Smith et al., 2003). Unlike  
478 Tha4, Hcf106 is typically found tightly complexed with cpTatC. Therefore, the use of the  
479  $\alpha$ -Hcf106 antibody is not viable as a sequestrant for native Hcf106 as it was for Tha4  
480 (Dabney-Smith et al., 2003) due to the tight association of Hcf106 with cpTatC. Previous  
481 experiments showed that integration of *in vitro* translated [<sup>3</sup>H]Hcf106 into thylakoid  
482 assembled into a 700 kDa receptor complex as analyzed by BN-PAGE (Fincher et al.,  
483 2003), setting the stage for a possible involvement of exogenously Hcf106 in the  
484 receptor complex. Here we further characterize integration of *in vitro* expressed Hcf106  
485 using cysteine substitutions and disulfide bond formation to demonstrate self-  
486 interactions and interactions with imported cpTatC and precursor. Introduction of  
487 cysteine substitutions into Hcf106 largely did not affect integration into the membrane or  
488 presence in the 700 kDa complex. Exceptions include Cys-substitutions in areas such  
489 as the TMD hydrophobic core, which lowered integration overall, likely due to a  
490 decrease in helix hydrophobicity, and in the hinge region, which may also be buried or  
491 involved in contacts with cpTatC. However, most of the Hcf106 Cys-substitutions tested  
492 do integrate into thylakoid allowing the study of the organization of the protein in a  
493 native membrane. In *E. coli*, in the absence of TatC, TatB formed a ladder of bands of  
494 about 100 kDa to over 880 kDa, suggesting that TatB has oligomeric properties on its  
495 own when it is not associated with TatC (Behrendt et al., 2007; Cleon et al., 2015). In  
496 the present study, we see ladders of full length and truncated Hcf106, which may be  
497 indicative of the separate pool of Hcf106; however, we also see formation of ladders of  
498 cpTatC that correspond in a linear manner to the integration of the truncated version of  
499 Hcf106. We conclude, therefore, that a substantial fraction of the incorporated,  
500 truncated Hcf106 is a part of the receptor complex with endogenous cpTatC.

501 We also identified residues in Hcf106 that are important to receptor complex  
502 assembly. For example, in the hinge region, e.g., G24C G27C, Cys-substituted Hcf106  
503 lost its ability to assemble into a 700 kDa receptor complex as analyzed by BN-PAGE,  
504 suggesting important contacts have been disrupted. This is in agreement with  
505 observations in *E. coli* TatB hinge where the Gly/Pro residues have been identified as  
506 essential for efficient substrate export (Barrett et al., 2003). There are at least three  
507 possible explanations for the absence of the 700 kDa complex when cysteines are  
508 substituted into the hinge of Hcf106. The first is that the substitution with Cys at those  
509 residues inhibited Hcf106-Hcf106 or Hcf106-cpTatC interactions, resulting in the  
510 absence of the 700 kDa complex. Second, Cys substitutions at those residues did not  
511 inhibit assembly *per se* but impacted the stability of the 700 kDa complex resulting in a  
512 receptor complex to be unable to withstand digitonin solubilization. Third, these  
513 substitutions resulted in decreased integration and therefore decreased participation in  
514 the 700 kDa complex. The third explanation is unlikely because Cys substitutions in the  
515 hinge region did not appear to inhibit integration and resistance to alkaline extraction of  
516 Hcf106. However, the data do suggest that the N terminus around residues G8 and E11  
517 and the hinge region around residues G24 and G27 are of great structural significance  
518 to the assembly or stability of the interaction between Hcf106 and cpTatC. Glycine often  
519 introduces more flexibility to protein structure, and so in replacing glycine with cysteine,  
520 the overall flexibility of the hinge region might be changed to interfere with an interaction  
521 with cpTatC. In addition to glycine, residue charge has been known to play an important  
522 role in membrane protein stability, possibly by forming a salt bridge and oligomeric  
523 structure solubilization (Wimley et al., 1996). For example, Tha4 contains a glutamate  
524 (E10) in the transmembrane region that has been shown to be critical for Tha4 function,  
525 possibly by stabilization of oligomers through salt bridge formation (Dabney-Smith et al.,  
526 2003). However, whether E11 in Hcf106 has a similar role is unclear. Other Hcf106  
527 residues, such as E41, Q43, and P44 may also affect interaction with cpTatC as shown  
528 by a decrease in the presence of those Hcf106 Cys variants in the 700 kDa complex. By  
529 replacing residues with Cys, Hcf106 contacts with cpTatC would be altered. Further  
530 studies are needed to clarify which region of cpTatC interacts with the N-terminus and  
531 hinge region of Hcf106. Currently, due to the existence of endogenous Hcf106, we are  
532 unable to determine whether these cysteine variants affect receptor complex  
533 functionality.

534 Truncated Hcf106<sub>1-107</sub> can assemble with endogenous cpTatC indicating that the  
535 C-tail is less important as compared with the TMD and APH for receptor complex  
536 formation. This is also in agreement with the observation in *E. coli* that significant  
537 transport was observed when 70 residues were removed from C-terminus of TatB (Lee  
538 et al., 2002). We designed these experiments to maximize the observable amount of the  
539 700 kDa receptor complex relative to homo-oligomeric Hcf106 complexes by adjusting  
540 the detergent:chlorophyll ratio. Based on our earlier BN-PAGE data, the homo-  
541 oligomeric forms should not appear on the gel. This allows us to interpret the lower  
542 bands seen when the truncated Hcf106 is incorporated into the receptor complex. As  
543 the amount of *in vitro* translated [<sup>3</sup>H]Hcf106<sub>1-107</sub> increases, more of the truncated protein  
544 assembled into a complex of lower molecular weight with cpTatC, indicating that  
545 Hcf106<sub>1-107</sub> has the ability to compete with endogenous Hcf106 and as the concentration  
546 of Hcf106<sub>1-107</sub> increases, more cpTatC assembled with the truncated Hcf106. However,



547 based on the immunoblotting data, the proportion of full length Hcf106 in a 700 kDa  
548 complex is less. The apparent ~600 kDa and ~500 kDa bands, together with the double  
549 Cys cross-linking data, strongly suggest that integrated recombinant Hcf106 may form  
550 oligomers in a separate pool and may compete with the endogenous Hcf106 for  
551 association with cpTatC. If the receptor complex contains eight copies of both Hcf106  
552 and cpTatC as predicted (Mori et al., 2001; Celedon and Cline, 2012), the ~600 kDa  
553 complexes may indicate approximately four endogenous Hcf106 were replaced with the  
554 truncated version while the ~500 kDa complexes indicates most, if not all, of the  
555 endogenous Hcf106 were replaced by truncated Hcf106.

556 Hcf106 shares structural similarity with Tha4. Both biochemical labeling (Aldridge  
557 et al., 2012) of Tha4 as well as solution NMR and computer simulation modeling  
558 (Rodriguez et al., 2013) of *E. coli* homolog TatA show that the TMD is tilted and the N-  
559 terminal APH is partially embedded in the membrane, rather than the TMD inserted  
560 vertically (e.g., TMD parallel to the bilayer normal) and the APH laying on the surface of  
561 membrane (e.g., perpendicular to the bilayer normal). The cross-linking data of Hcf106  
562 presented here also suggest a similar topology for Hcf106. We saw limited interactions  
563 between residues L28C to R40C (N-proximal region of the APH), which could be  
564 explained by being in the low dielectric environment of the hydrophobic core of the  
565 membrane.

566 In summary, to systematically study Hcf106, a critical component in the  
567 chloroplast Tat system, a recombinant library of single Cys-substitutions from the N-  
568 terminus to the end of APH was generated. Here we demonstrate that exogenous,  
569 recombinant Hcf106 was able to insert into thylakoid and participates directly in the  
570 cpTat receptor complex, likely by replacing endogenous, Cys-less versions of Hcf106.  
571 This library not only helped clarify Hcf106 self-contacts but also demonstrated that  
572 exogenously integrated Hcf106 interacts with the precursor signal peptide via the  
573 Hcf106 APH and that the TMD was identified to form close contacts with cpTatC TM5.  
574 These interaction data further confirm the capability of *in vitro* integrated Hcf106 to  
575 function in the thylakoid membrane system and demonstrates a new tool to evaluate the  
576 organization of cpTat complexes.

577

### 578 **Acknowledgements**

579 This work was supported by the Department of Energy: Office of Science Basic Energy  
580 Science (Award DE-SC0014441 to CDS). The authors wish to thank Ken Cline  
581 (University of Florida) for the cpTatC clones and members of the Dabney-Smith lab for  
582 critical reading of the manuscript.

583

### 584 **Author Contributions**

585 QM and CDS designed the research; QM and KF performed research; QM, KF, CPN,  
586 and CDS analyzed data; QM, CPN, and CDS wrote the manuscript.



587 **References**

- 588 **Alami M, Luke I, Deitermann S, Eisner G, Koch HG, Brunner J, Müller M** (2003)  
589 Differential interactions between a twin-arginine signal peptide and its  
590 translocase in *Escherichia coli*. *Mol Cell* **12**: 937-946
- 591 **Aldridge C, Ma X, Gerard F, Cline K** (2014) Substrate-gated docking of pore subunit  
592 Tha4 in the TatC cavity initiates Tat translocase assembly. *The Journal of cell*  
593 *biology* **205**: 51-65
- 594 **Aldridge C, Ma X, Gerard F, Cline K** (2014) Substrate-gated docking of pore subunit  
595 Tha4 in the TatC cavity initiates Tat translocase assembly. *J Cell Biol* **205**: 51-65
- 596 **Aldridge C, Storm A, Cline K, Dabney-Smith C** (2012) The chloroplast twin arginine  
597 transport (tat) component, tha4, undergoes conformational changes leading to tat  
598 protein transport. *J Biol Chem* **287**: 34752-34763
- 599 **Barrett CM, Mathers JE, Robinson C** (2003) Identification of key regions within the  
600 *Escherichia coli* TatAB subunits. *FEBS Lett* **537**: 42-46
- 601 **Behrendt J, Bruser T** (2014) The TatBC complex of the Tat protein translocase in  
602 *Escherichia coli* and its transition to the substrate-bound TatABC complex.  
603 *Biochemistry* **53**: 2344-2354
- 604 **Behrendt J, Lindenstrauss U, Bruser T** (2007) The TatBC complex formation  
605 suppresses a modular TatB-multimerization in *Escherichia coli*. *FEBS Lett* **581**:  
606 4085-4090
- 607 **Berks BC** (2015) The twin-arginine protein translocation pathway. *Annual review of*  
608 *biochemistry* **84**: 843-864
- 609 **Blummel AS, Haag LA, Eimer E, Muller M, Frobel J** (2015) Initial assembly steps of a  
610 translocase for folded proteins. *Nat Commun* **6**: 7234
- 611 **Bolhuis A, Mathers JE, Thomas JD, Barrett CM, Robinson C** (2001) TatB and TatC  
612 form a functional and structural unit of the twin- arginine translocase from  
613 *Escherichia coli*. *J Biol Chem* **276**: 20213-20219.
- 614 **Braun NA, Davis AW, Theg SM** (2007) The chloroplast Tat pathway utilizes the  
615 transmembrane electric potential as an energy source. *Biophys J* **93**: 1993-1998
- 616 **Celedon JM, Cline K** (2012) Stoichiometry for binding and transport by the twin  
617 arginine translocation system. *The Journal of cell biology* **197**: 523-534
- 618 **Celedon JM, Cline K** (2013) Intra-plastid protein trafficking: How plant cells adapted  
619 prokaryotic mechanisms to the eukaryotic condition. *Biochimica Et Biophysica*  
620 *Acta-Molecular Cell Research* **1833**: 341-351
- 621 **Cleon F, Habersetzer J, Alcock F, Kneuper H, Stansfeld PJ, Basit H, Wallace MI,**  
622 **Berks BC, Palmer T** (2015) The TatC component of the twin-arginine protein  
623 translocase functions as an obligate oligomer. *Molecular microbiology*
- 624 **Cline K** (1986) Import of proteins into chloroplasts. Membrane integration of a thylakoid  
625 precursor protein reconstituted in chloroplast lysates. *J Biol Chem* **261**: 14804-  
626 14810
- 627 **Cline K** (2015) Mechanistic Aspects of Folded Protein Transport by the Twin Arginine  
628 Translocase (Tat). *J Biol Chem* **290**: 16530-16538
- 629 **Cline K** (2015) Mechanistic Aspects of Folded Protein Transport by the Twin Arginine  
630 Translocase (Tat). *The Journal of biological chemistry* **290**: 16530-16538
- 631 **Cline K, Henry R, Li C, Yuan J** (1993) Multiple pathways for protein transport into or  
632 across the thylakoid membrane. *Embo J* **12**: 4105-4114

- 633 **Cline K, Mori H** (2001) Thylakoid DeltapH-dependent precursor proteins bind to a  
634 cpTatC-Hcf106 complex before Tha4-dependent transport. *J Cell Biol* **154**: 719-  
635 729.
- 636 **Dabney-Smith C, Cline K** (2009) Clustering of C-terminal stromal domains of Tha4  
637 homo-oligomers during translocation by the Tat protein transport system. *Mol*  
638 *Biol Cell* **20**: 2060-2069
- 639 **Dabney-Smith C, Mori H, Cline K** (2003) Requirement of a Tha4-conserved  
640 transmembrane glutamate in thylakoid Tat translocase assembly revealed by  
641 biochemical complementation. *J Biol Chem* **278**: 43027-43033
- 642 **Dabney-Smith C, Mori H, Cline K** (2006) Oligomers of Tha4 organize at the thylakoid  
643 Tat translocase during protein transport. *J Biol Chem* **281**: 5476-5483
- 644 **Fincher V, Dabney-Smith C, Cline K** (2003) Functional assembly of thylakoid deltapH-  
645 dependent/Tat protein transport pathway components in vitro. *Eur J Biochem*  
646 **270**: 4930-4941
- 647 **Gérard F, Cline K** (2006) Efficient twin arginine translocation (Tat) pathway transport of  
648 a precursor protein covalently anchored to its initial cpTatC binding site. *J Biol*  
649 *Chem* **281**: 6130-6135
- 650 **Gérard F, Cline K** (2007) The thylakoid proton gradient promotes an advanced stage of  
651 signal peptide binding deep within the Tat pathway receptor complex. *J Biol*  
652 *Chem* **282**: 5263-5272
- 653 **Holzappel E, Eisner G, Alami M, Barrett CM, Buchanan G, Luke I, Betton JM,**  
654 **Robinson C, Palmer T, Moser M, Muller M** (2007) The entire N-terminal half of  
655 TatC is involved in twin-arginine precursor binding. *Biochemistry* **46**: 2892-2898
- 656 **Hu Y, Zhao E, Li H, Xia B, Jin C** (2010) Solution NMR structure of the TatA component  
657 of the twin-arginine protein transport system from gram-positive bacterium  
658 *Bacillus subtilis*. *J Am Chem Soc* **132**: 15942-15944
- 659 **Kneuper H, Maldonado B, Jager F, Krehenbrink M, Buchanan G, Keller R, Muller**  
660 **M, Berks BC, Palmer T** (2012) Molecular dissection of TatC defines critical  
661 regions essential for protein transport and a TatB-TatC contact site. *Molecular*  
662 *microbiology* **85**: 945-961
- 663 **Lee PA, Buchanan G, Stanley NR, Berks BC, Palmer T** (2002) Truncation analysis of  
664 TatA and TatB defines the minimal functional units required for protein  
665 translocation. *J Bacteriol* **184**: 5871-5879
- 666 **Lee PA, Orriss GL, Buchanan G, Greene NP, Bond PJ, Punginelli C, Jack RL,**  
667 **Sansom MS, Berks BC, Palmer T** (2006) Cysteine-scanning mutagenesis and  
668 disulfide mapping studies of the conserved domain of the twin-arginine  
669 translocase TatB component. *J Biol Chem* **281**: 34072-34085
- 670 **Ma X, Cline K** (2010) Multiple precursor proteins bind individual Tat receptor complexes  
671 and are collectively transported. *EMBO J* **29**: 1477-1488
- 672 **Ma X, Cline K** (2013) Mapping the signal peptide binding and oligomer contact sites of  
673 the core subunit of the pea twin arginine protein translocase. *The Plant cell* **25**:  
674 999-1015
- 675 **Maldonado B, Kneuper H, Buchanan G, Hatzixanthis K, Sargent F, Berks BC,**  
676 **Palmer T** (2011) Characterisation of the membrane-extrinsic domain of the TatB  
677 component of the twin arginine protein translocase. *FEBS letters* **585**: 478-484

- 678 **Maurer C, Panahandeh S, Jungkamp AC, Moser M, Müller M** (2010) TatB functions  
679 as an oligomeric binding site for folded Tat precursor proteins. *Mol Biol Cell* **21**:  
680 4151-4161
- 681 **Mori H, Cline K** (2002) A twin arginine signal peptide and the pH gradient trigger  
682 reversible assembly of the thylakoid [Delta]pH/Tat translocase. *J Cell Biol* **157**:  
683 205-210.
- 684 **Mori H, Summer EJ, Cline K** (2001) Chloroplast TatC plays a direct role in thylakoid  
685 (Delta)pH-dependent protein transport. *FEBS Lett* **501**: 65-68.
- 686 **Pal D, Fite K, Dabney-Smith C** (2013) Direct interaction between a precursor mature  
687 domain and transport component Tha4 during twin arginine transport of  
688 chloroplasts. *Plant physiology* **161**: 990-1001
- 689 **Pettersson P, Ye W, Jakob M, Tannert F, Klosgen RB, Maler L** (2018) Structure and  
690 dynamics of plant TatA in micelles and lipid bilayers studied by solution NMR.  
691 *FEBS J* **285**: 1886-1906
- 692 **Ramasamy S, Abrol R, Suloway CJ, Clemons WM, Jr.** (2013) The glove-like  
693 structure of the conserved membrane protein TatC provides insight into signal  
694 sequence recognition in twin-arginine translocation. *Structure* **21**: 777-788
- 695 **Rodriguez F, Rouse SL, Tait CE, Harmer J, De RA, Timmel CR, Sansom MS, Berks**  
696 **BC, Schnell JR** (2013) Structural model for the protein-translocating element of  
697 the twin-arginine transport system. *Proceedings of the National Academy of*  
698 *Sciences of the United States of America* **110**: E1092-1101
- 699 **Rolland N, Ferro M, Ephritikhine G, Marmagne A, Ramus C, Brugiere S, Salvi D,**  
700 **Seigneurin-Berny D, Bourguignon J, Barbier-Brygoo H, Joyard J, Garin J**  
701 (2006) A versatile method for deciphering plant membrane proteomes. *J Exp Bot*  
702 **57**: 1579-1589
- 703 **Rollauer SE, Tarry MJ, Graham JE, Jaaskelainen M, Jager F, Johnson S,**  
704 **Krehenbrink M, Liu SM, Lukey MJ, Marcoux J, McDowell MA, Rodriguez F,**  
705 **Roversi P, Stansfeld PJ, Robinson CV, Sansom MS, Palmer T, Hogbom M,**  
706 **Berks BC, Lea SM** (2012) Structure of the TatC core of the twin-arginine protein  
707 transport system. *Nature* **492**: 210-214
- 708 **Schneider CA, Rasband WS, Eliceiri KW** (2012) NIH Image to ImageJ: 25 years of  
709 image analysis. *Nat Methods* **9**: 671-675
- 710 **Wimley WC, Gawrisch K, Creamer TP, White SH** (1996) Direct measurement of salt-  
711 bridge solvation energies using a peptide model system: implications for protein  
712 stability. *Proceedings of the National Academy of Sciences of the United States*  
713 *of America* **93**: 2985-2990
- 714 **Zhang Y, Wang L, Hu Y, Jin C** (2014) Solution structure of the TatB component of the  
715 twin-arginine translocation system. *Biochimica et biophysica acta* **1838**: 1881-  
716 1888

## 717 718 **Figure Legends**

719 **Figure 1. Topologic model of Hcf106 based on experimental and predictive**  
720 **structural features.** Primary residue sequence of Hcf106 from *Pisum sativum*. Amino  
721 acids in regions under investigation in this study are numbered (2-71). Dark gray  
722 indicates the hydrophobic core (i.e. acyl chains) of the membrane, while the lighter gray  
723 indicates the lipid head groups.

724

725 **Figure 2. Blue-native gel analysis of the integration of recombinant Hcf106**  
726 **cysteine variants.** [<sup>3</sup>H]Hcf106 single cysteine variants containing complexes were  
727 analyzed by BN-PAGE and fluorography (Materials and Methods). Single Cys  
728 substitutions at multiple positions in Hcf106 are indicated across the top of the panels.  
729 The 700 kDa complex is indicated by an arrow. Wild-type Hcf106 was used as a control.  
730 Molecular mass markers are ferritin (880 and 440 kDa) and BSA (132 kDa). Gels are  
731 representative of at least three experiments.

732

733 **Figure 3. Truncated Hcf106<sub>1-107</sub> assembles into a complex with endogenous**  
734 **cpTatC.** An increasing concentration of Hcf106<sub>1-107</sub> was integrated into thylakoid and  
735 subjected to digitonin solubilization, BN-PAGE, and analysis by fluorography (left panel)  
736 as in Figure 2. To detect whether this truncated form can generate a different size of the  
737 receptor complex, samples were also subjected to immunoblotting with anti-cpTatC  
738 (middle panel), anti-Hcf106 (right panel) antibodies. The amount of Hcf106<sub>1-107</sub> added to  
739 thylakoid corresponds to dilutions of the *in vitro* translation reaction (i.e., 1:60, 1:12, 1:6,  
740 and 1:3). Gels are representative of at least three separate experiments. As Hcf106<sub>1-107</sub>  
741 increases, there is a concomitant increase in a smaller complex also containing cpTatC  
742 (asterisks).

743

744 **Figure 4. Hcf106 forms a dimer when cysteine substitutions are in N-terminus, the**  
745 **central TMD, and the APH regions.** *In vitro* translated Hcf106 variants were integrated  
746 into NEM pre-treated thylakoid membranes and subjected to oxidizing conditions (1 mM  
747 CuP) as described (Materials and Methods). Samples were resolved by SDS-PAGE and  
748 protein bands were visualized by fluorography. The amino acid position of each cysteine  
749 substitution is shown above each panel. Hcf106 monomer (m) and dimer (di) forms are  
750 indicated at the right of the panels. Gels are representative of at least three separate  
751 experiments.

752

753 **Figure 5. Helical wheel projection of the TMD and APH regions of Hcf106 reveals**  
754 **periodic interactions.** Helical wheel projections were generated using the Protean  
755 module of DNASTar (Lasergene, Madison WI). (A) The TMD and Hinge of Hcf106,  
756 residues A12C-G27C; (B) the N-terminal proximal portion of the APH of Hcf106,  
757 residues L28C-P44C; and (C) the C-terminal proximal portion of the APH of Hcf106,  
758 residues T45C-G65C. The shading represents the hydrophobicity of the amino acid,  
759 hydrophilic amino acids are more lightly shaded. Stars indicate the presence of a dimer  
760 that is >10% of total (see Supplemental Figure S2).

761

762 **Figure 6. Double cysteine substitutions demonstrate a higher order Hcf106**  
763 **complex.** (A) Lanes 1-6 show the cross-linking of double cysteine variants L13CL21C,  
764 I49CE61C V14CL20C and R54CL60C and the single Cys variant L21C under non-  
765 reducing conditions. Lanes 7-12 show the same samples under reducing conditions.  
766 The amount of protein integrated relative to the parent single Cys variant, L21C, is  
767 shown below lanes 7-12. Translation products diluted 1:40 are shown in lanes 13-17.  
768 Molecular weight markers are indicated on the right and left. (B) Crosslinking with the  
769 G6CV14C double cysteine variant was compared to the single Cys mutant V14C and

770 double mutant V14CL20C (lanes 1-3). G6CV14C showed higher ordered Hcf106  
771 complexes up to octamers when analyzed by 10-20% SDS-PAGE (lane 4). (C) Cross-  
772 linked G6CV14C double Cys variant has reduced capability to incorporate into the  
773 receptor complex. Lane 2 is the standard cross-linking condition with 5 min incubation of  
774 CuP and the reaction was quenched with 50mM NEM. Lane 1: translation product was  
775 pre-treated with NEM and subjected to standard cross-linking. Lanes 3-6: cross-linking  
776 under variable time or with/without NEM quenching. Lane 6: WT Hcf106 under standard  
777 cross-linking conditions. The same samples from lanes 1-5 were also subjected to non-  
778 denaturing SDS-PAGE (lane 7-11). Asterisks indicate the number of Hcf106 monomers  
779 in the oligomer as determined by size. Arrows indicate additional bands of cross-linked  
780 G6CV14C. The amount of protein integrated relative to the parent single Cys variants,  
781 V14C, is shown below the lanes. Gels in both panels represent at least three separate  
782 experiments.

783

784 **Figure 7. Integrated Hcf106 interacts directly with imported cpTatC and the signal**  
785 **peptide of the precursor.** (A) *In vitro* translated [<sup>3</sup>H]cpTatCaaaV270C was imported  
786 into intact chloroplasts. Intact chloroplasts were isolated over a 35% Percoll cushion  
787 (Materials and Methods) and recovered thylakoid were used for integration of unlabeled  
788 Hcf106 Cys variants, as indicated across the top of the panels, or the same volume of  
789 IB, 10 mM MgCl<sub>2</sub> as control. Hcf106 TMD shows cross-linking with cpTatC TM5 in a  
790 ~56 kDa band that migrates higher than the nonspecific bands in the control lane.  
791 Translation products (tp) diluted 1:40 are shown. (B) Residue sequence of the signal  
792 peptide of tOE17-25CV-20F showing the -25C substitution, the RR motif, and the V-20F  
793 substitution. (C) *In vitro* translated unlabeled Hcf106 Cys variants, as indicated across  
794 the top of the panel, were integrated into isolated thylakoids. Thylakoid were then  
795 washed to remove unintegrated protein (Materials and Methods) and incubated with  
796 either precursor, [<sup>3</sup>H]tOE17-25CV-20F, or the same volume of IB, 10 mM MgCl<sub>2</sub> as  
797 control. Gels in both panels are representative of at least three separate experiments.





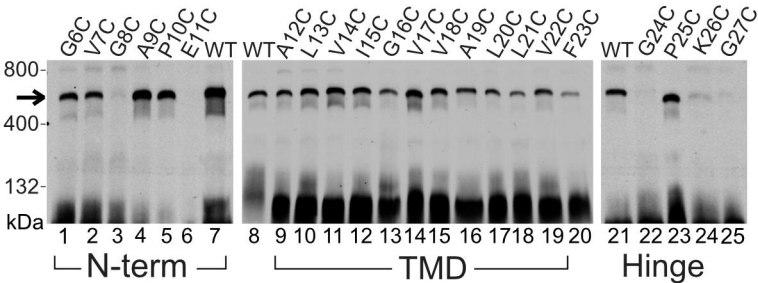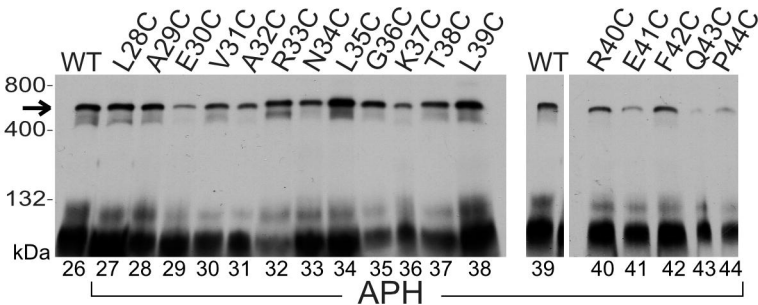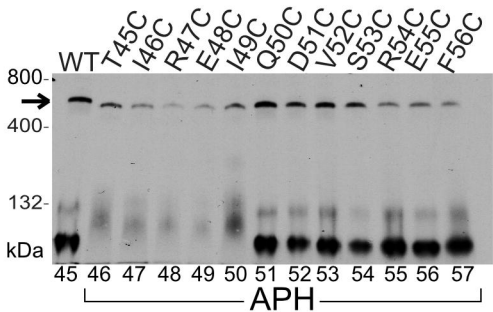

# Ma, et al., Figure 3

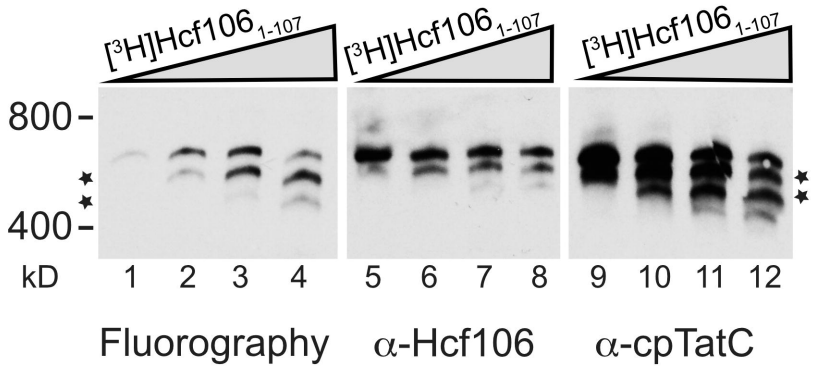

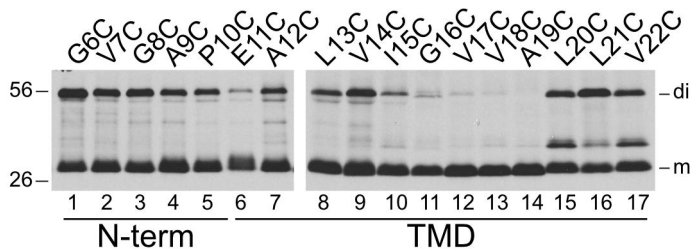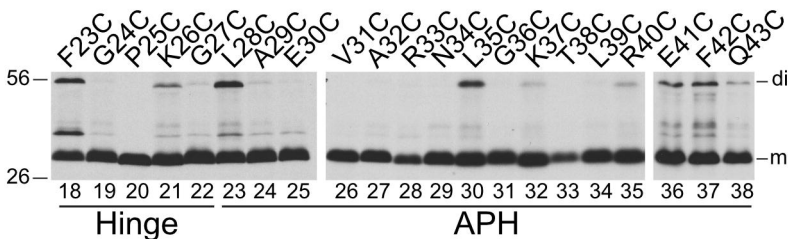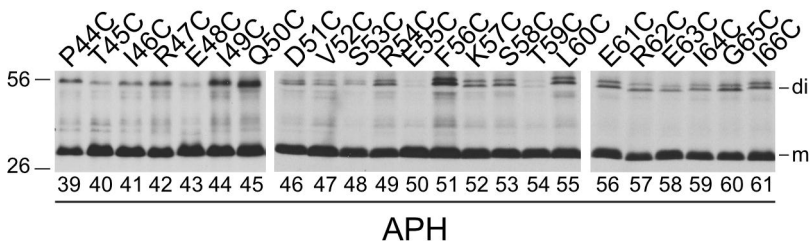

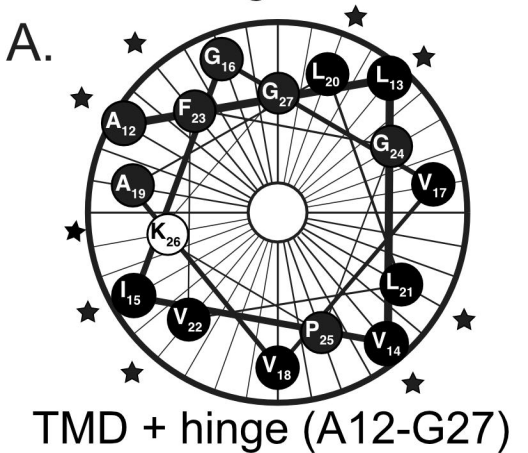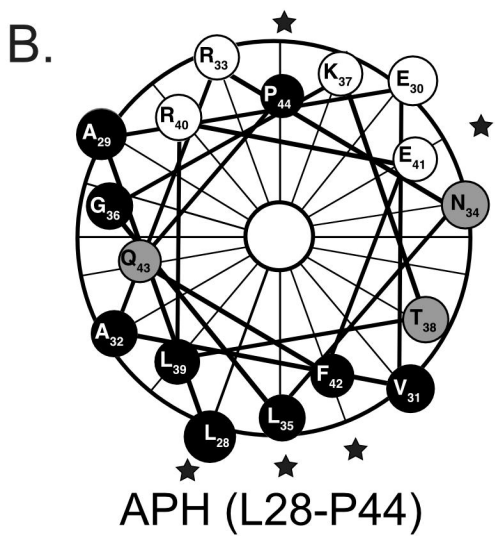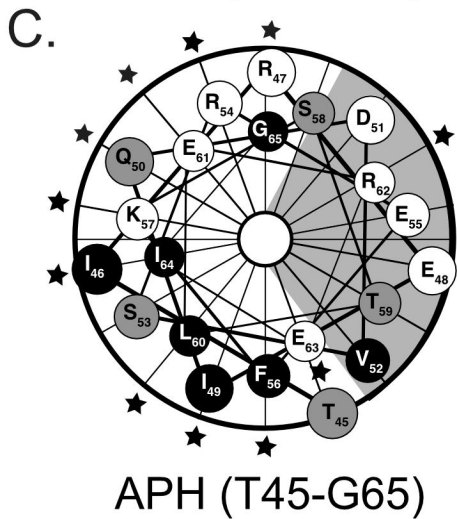



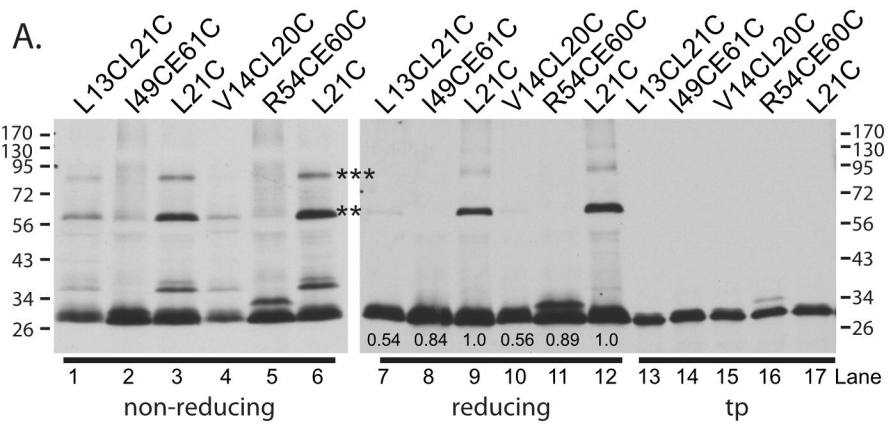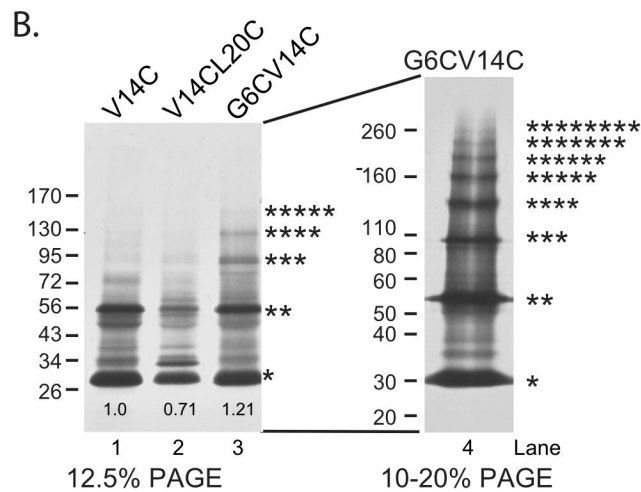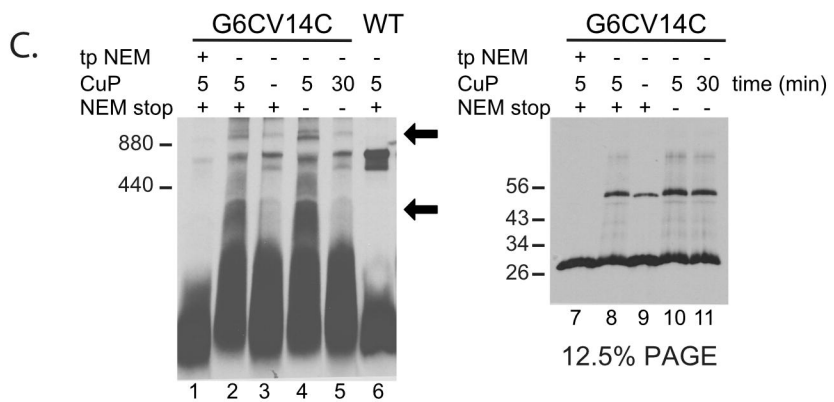

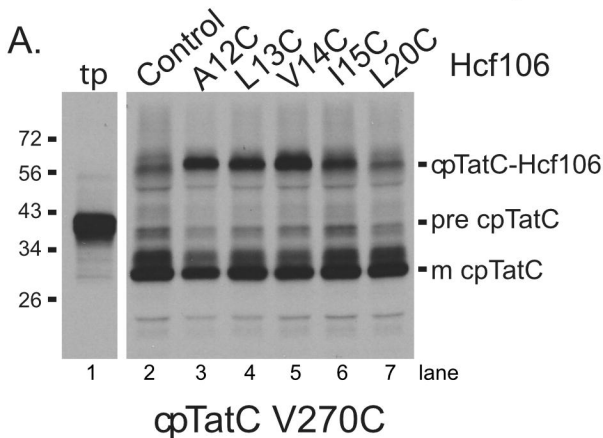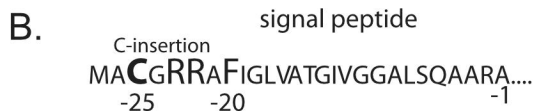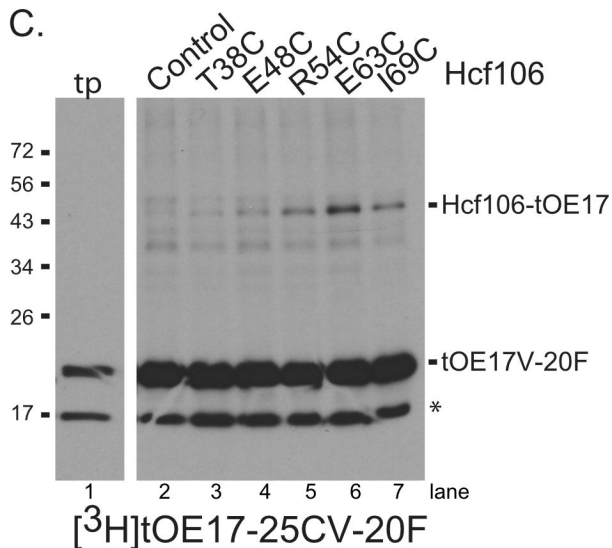

Source: http://biorxiv.org/content/10.1101/382812v1.full.pdf
